## Modulation of aflatoxin biomarkers in human blood and urine by green tea polyphenols intervention

Lili Tang, Meng Tang, Li Xu, Haitao Luo, Tianren Huang<sup>1</sup>, Jiahua Yu<sup>1</sup>, Lisheng Zhang<sup>1</sup>, Weimin Gao, Stephen B.Cox and Jia-Sheng Wang\*

Department of Environmental Toxicology, The Institute of Environmental and Human Health, Texas Tech University, PO Box 41163, Lubbock, TX 79409-1163, USA and <sup>1</sup>Guangxi Cancer Institute, Nanning, Guangxi 530021, China

\*To whom correspondence should be addressed. Tel: +1 806 8850320;  
Fax: +1 806 8852132;  
Email: js.wang@ttu.edu

To evaluate the efficacy of green tea polyphenols (GTPs) in modulating aflatoxin B<sub>1</sub> (AFB<sub>1</sub>) biomarkers, a total of 352 serum samples and 352 urine samples collected from a 3 month chemoprevention trial with 500 mg GTPs, 1000 mg GTPs and a placebo were measured for AFB<sub>1</sub>-albumin adducts (AFB-AA), aflatoxin M<sub>1</sub> (AFM<sub>1</sub>) and aflatoxin B<sub>1</sub>-mercapturic acid (AFB-NAC). Levels of AFB-AA at baseline were comparable for all three dose groups ( $P = 0.506$ ). No significant differences were observed in AFB-AA levels in the placebo group over the 3 month period ( $P = 0.252$ ). However, a significant reduction in AFB-AA levels was observed in the 500 mg group ( $P = 0.002$ ). A marginally significant reduction in AFB-AA levels was also found in the 1000 mg group over the 3 month intervention period ( $P = 0.051$ ). An analysis using a mixed-effects model indicated that the reduction in AFB-AA levels over time was dose and time dependent (dose-time interaction  $P = 0.049$ ). There were no significant differences in median AFM<sub>1</sub> levels among the three study groups at the baseline ( $P = 0.832$ ), 1 month ( $P = 0.188$ ) and 3 months ( $P = 0.132$ ) of the GTP intervention; however, reduction of 42 and 43% in median AFM<sub>1</sub> levels, as compared with the placebo, were found in 500 mg ( $P = 0.096$ ) and 1000 mg ( $P = 0.072$ ) groups at 3 months of the intervention. Significant elevations in median AFB-NAC levels and the ratio of AFB-NAC:AFM<sub>1</sub> were found in both 500 and 1000 mg groups compared with the placebo group at both 1 month ( $P < 0.001$ ) and 3 months ( $P < 0.001$ ) of GTPs intervention. These results demonstrate that GTPs effectively modulate AFB<sub>1</sub> metabolism and metabolic activation.

### Introduction

Primary liver cancer, mainly hepatocellular carcinoma (HCC), is one of the most common cancers in southeast Asia and west Africa (1,2). The poor prognosis of this malignancy results in it being the third most common cause of cancer deaths in the world (1). In China, HCC is the second leading cause of cancer mortality with at least 350 000 deaths per year (3). There are several endemic regions in China, where HCC is the number one cause of cancer death and the annual incidence rate is usually higher than 50/10<sup>5</sup> people (3). Southern Guangxi is one of these areas with the highest HCC incidence and mortality in China. In the period of 1997–2003, the mean morbidity rate of HCC in this area was 52.79/10<sup>5</sup> (4). The median age of onset of this malignancy is between 35 and 45 years. Epidemiological studies have found that chronic infection with hepatitis B virus (HBV) and dietary

**Abbreviations:** AF, aflatoxin; AFB<sub>1</sub>, aflatoxin B<sub>1</sub>; AFB-AA, aflatoxin B<sub>1</sub>-albumin adducts; AFM<sub>1</sub>, aflatoxin M<sub>1</sub>; AFB-NAC, aflatoxin B<sub>1</sub>-mercapturic acid; ELISA, enzyme-linked immunosorbent assay; GST, glutathione S-transferase; GTP, green tea polyphenol; HBV, hepatitis B virus; HCC, hepatocellular carcinoma; HPLC, high-performance liquid chromatography; IAC, immunoaffinity column; MeOH, methanol; PBS, phosphate buffering solution; RIA, radioimmunoassay; SD, standard deviation.

aflatoxin (AF) exposure are major etiologic risk factors for HCC in this high-risk area (5).

AFs, produced predominantly by *Aspergillus flavus* and *Aspergillus parasiticus*, represent a group of fungal metabolites (mycotoxins) that have long been recognized as hazardous contaminants of food (6). Aflatoxin B<sub>1</sub> (AFB<sub>1</sub>) is hepatotoxic and genotoxic and has been categorized as a known human carcinogen (Group I) (7–9). Chronic exposure to low levels of AFs has been proven to be one of the major risk factors in the etiology of HCC in several regions of Africa and Southeast Asia (10). More importantly, several nested case-control studies have demonstrated a synergistic interaction between AF and HBV for the risk of HCC (11,12). Therefore, the development and application of practical and highly effective intervention strategies for minimizing AF exposure and blocking carcinogenic effect is critical for reducing HCC risk, especially in high-risk populations.

Primary prevention strategies against major etiologic risk factors, such as vaccination of HBV in infants and food safety procedures to control AF contamination, have offered the best hope for lowering HCC rates in the world (13); however, they may require many years to implement. Therefore, a secondary prevention strategy, such as chemoprevention, has been widely considered a useful tool in high-risk populations (14). In fact, human chemoprevention trials aimed at lowering AF biomarkers have been conducted in high-risk populations of China (15–17) examining the use of oltipraz, chlorophyllin and green tea extracts.

Green tea or its major components, green tea polyphenols (GTPs), have been shown to be highly effective in inhibiting a variety of carcinogen-induced tumorigenesis in animal models for different target organ sites, including AF-induced liver tumors (18–20). Several studies observed that GTPs modulated AFB<sub>1</sub> metabolism, inhibited AFB<sub>1</sub> DNA binding and AFB<sub>1</sub>-induced glutathione S-transferase (GST)-positive hepatocytes (18) and suppressed AFB<sub>1</sub>-induced chromosome aberration in rats (21). GTPs are characterized by di- or tri-hydroxyl group substitution on the B-ring and the meta-5,7-dihydroxy substitution at the A-ring (22), which possesses strong antioxidant activity due to their metal chelating and free radical quenching ability.

Given the safety and efficacy of GTPs in multiple animal models, as well as its low cost, GTPs may be beneficial in modulating carcinogen metabolism and reducing oxidative stresses caused by carcinogen exposure, and therefore, reducing risk of HCC. To directly examine the possible adverse effect of GTPs in human subjects and study the modulation of GTPs on AF biomarkers in individuals at high risk of HCC, a randomized, double-blinded and placebo-controlled phase IIa chemoprevention trial was conducted in residents of Southern Guangxi, China (15). Our recent study showed that administration of GTP capsules to human subjects for 3 months effectively reduced levels of 8-hydroxydeoxyguanosine, the oxidative DNA damage biomarker (23). In this report, the efficacy of GTPs intervention was further evaluated by analyzing AF biomarkers in serum and urine samples collected prior to the study (baseline) and at 1 and 3 months of the study.

### Materials and methods

#### Materials

GTPs were obtained from the USA–China joint venture Shili Natural Product Company (Guilin, Guangxi, China) and encapsulated by the Guangxi Pharmaceutical Company (Nanning, Guangxi, China). The purity of GTPs is higher than 98.5% according to the analysis by the Guangxi Standard Bureau. Each capsule of GTP contains 116 mg (-)-epigallocatechin-3-gallate, 53 mg epicatechin-3-gallate, 25 mg (-)-epicatechin 25, 19 mg (-)-epigallocatechin, 24 mg gallic acid and 11 mg catechin according to the analysis using high-performance liquid chromatography (HPLC)–electro-CoulArray detection and HPLC–ultraviolet methods. [<sup>3</sup>H]-AFB<sub>1</sub> (28 Ci/mmol) was purchased from Moravek Biochemicals (Brea, CA). Monoclonal antibodies 2B11 and 2F5 were

kindly provided by Dr G.N.Wogan at Massachusetts Institute of Technology. Aflatoxin B<sub>1</sub>-mercapturic acid (AFB-NAC) was synthesized as reported previously by Scholl *et al.* (24). AFB<sub>1</sub>, AFB<sub>2</sub>, aflatoxin M<sub>1</sub> (AFM<sub>1</sub>), albumin and creatinine detection kits were purchased from Sigma-Aldrich Chemical Company (St Louis, MO). Oasis® HLB cartridges were products of Waters Corporation (Milford, MA). All organic solvents used were of HPLC grade. Other chemicals and reagents were purchased commercially at the highest degree of purity available.

#### Study sites, subjects and protocols

For human subject protection, this study was approved by the Institutional Review Boards at Texas Tech University and Guangxi Cancer Institute. The overall study design was described previously (15). Briefly, the study site includes two villages (Sanhe and Zhuqing), located 45 km southwest of Fusui county, Guangxi Zhuang Autonomous Region, China. The site is a rural farming community with ~7500 residents and it belongs to the Qujiu Township, one of the three townships with the highest incidence and mortality of liver cancer (~100/100 000) in Fusui county. Twelve hundred blood samples were screened for AFB<sub>1</sub>-albumin adducts (AFB-AA) and HBV infection status, and 120 voluntary residents were enrolled into this trial. The recruiting criteria included healthy adults with positive serum hepatitis B virus surface antigen and AFB-AA, aged 20–55, normal liver function test (alanine aminotransferase < 80 U/ml), alpha-fetoprotein negative, no personal history of cancer, no use of prescribed medications and no pregnancy and lactation for female participants. Informed consent was obtained from each participant before they were randomly assigned to one of three study groups. Baseline blood and urine samples were collected before the trial began. Randomization was successful: no significant differences with regard to age, gender and baseline AFB-AA levels were found among groups (15). Participants were instructed to take four capsules daily containing either 500 mg GTPs (low dose, *n* = 40), 1000 mg GTPs (high dose, *n* = 40) or 1000 mg medicinal starch as the placebo control (*n* = 40). The doses of 500 and 1000 mg GTPs were chosen to be equivalent to two and four 500 ml cups of green tea drink, respectively. Follow-up visits were made every other day at the participant's house to record possible adverse effect complaints and to count the remaining capsules for adherence assessment. No severe adverse effects were recorded according to the clinical tests of blood and urine samples at each collection, including blood counts, blood chemistry, alanine aminotransferase, aspartate aminotransferase, urinary protein, glucose, blood and others (15). An excellent person-time compliance (99.5%) was achieved (15).

#### Sample collection

In addition to regular epidemiological questionnaires, blood samples (5 ml for serum and 5 ml for plasma) and 24 h urine samples were collected at 1 and 3 months of the trial. Serum, plasma and blood cells were immediately separated and stored at -20°C in the village clinics. Twenty-four hour urine samples were collected in the morning, noon and evening in 1 day and kept in amber bottles containing ascorbic acid (20 mg/ml) and ethylenediaminetetraacetic acid (0.1 M). Aliquots of urine samples (50 ml) were treated with 500 mg ascorbic acid and 12.5 mg ethylenediaminetetraacetic acid for biomarker analysis. All samples were shipped frozen to Texas Tech University and the laboratory personnel who performed analysis were blinded to sample sources. Sample collection, storage and shipment complied with guidelines of both Chinese and USA governments.

#### Determination of serum levels

A quantitative radioimmunoassay (RIA) procedure with monoclonal antibody 2B11 was used to measure AFB-AA (25). Briefly, serum albumin was concentrated, digested and dissolved in 100 µl of phosphate buffering solution (PBS) and added to monoclonal antibody 2B11, which was dissolved in 100 µl of PBS with 10% horse serum. A tracer solution (100 µl) containing 12 000 d.p.m. of [<sup>3</sup>H] AFB<sub>1</sub> was then added. After incubation for 2 h, 300 µl of saturated ammonium sulfate was added and the sample was mixed and incubated for 15 min. This solution was centrifuged for 15 min at 9800g and the radioactivity remaining in the supernatant was determined by liquid scintillation spectrometry. Non-specific inhibition in the assay was determined by processing pooled normal rat serum (Sigma-Aldrich Chemical Company). The average value was subtracted from those of the study samples in calculating AFB-AA levels. Standard curves were determined using a non-linear regression method as described previously (26). Values were expressed as the amount of AFB<sub>1</sub>/mg albumin, measured colorimetrically with bromocresol green at 628 nm (Sigma-Aldrich Chemical Company). As the purpose of quality control, AFB<sub>1</sub>-treated rat serum with known AFB-AA concentration was spiked to normal human serum and was concurrently processed for RIA. The limit of detection is 0.01 pmol AFB<sub>1</sub>/mg albumin.

#### Determination of AFB<sub>1</sub> metabolites in urine

A modified immunoaffinity-HPLC-fluorescence detection method was used to measure the AFB<sub>1</sub> metabolites in urine (12,27). Briefly, 10 ml of urine sample (in some samples 1 ng AFB<sub>2</sub> was spiked as internal standard) was pH adjusted with ammonium formate (1 M, pH 4.5) and loaded into a conditioned Oasis® HLB column. The column was washed with 10 ml of water and 10 ml of 5% methanol (MeOH) before being eluted by 3 ml of MeOH. The eluate was dried under ultra high purity N<sub>2</sub> and reconstituted with 2 ml of PBS (pH 7.2). The reconstituted urine extract was then loaded into the prepared and conditioned immunoaffinity column (IAC) including both 2B11 and 2F5 monoclonal antibodies at a flow rate of 0.3 ml/min. The affinity column was then washed twice with 5 ml of PBS (pH 7.2) and once with 10 ml of water to remove non-specifically bound materials. AF derivatives were eluted from the IAC with 2 ml of 60% dimethylsulfoxide in water. The elution was diluted with 8 ml of water and loaded into a conditioned Oasis® HLB column and washed with 10 ml of water and 10 ml of 5% MeOH. The concentrated AF derivatives were eluted with 3 ml of MeOH and were reduced to ~100 µl under ultra high purity N<sub>2</sub> and mixed with 5 mM triethylammonium formate (pH 3.0) to reach 400 µl before analysis by HPLC.

Urinary AFM<sub>1</sub> and AFB-NAC were analyzed by reversed-phase HPLC on an Agilent 1100 system consisting of a diode-array ultraviolet detector (wavelength 362 nm) connected in series with a fluorescence detector (366 nm excitation and 436 nm emission). The HPLC column used was a C18 5 µm (150 × 4.6 mm) Microsorb analytical column (Varian, Palo Alto, CA). Chromatographic separation was obtained by a 5–25% ethanol linear gradient in water generated over a 25 min period followed by isocratic elution with 25% ethanol in water, all at a flow rate of 1 ml/min. The mobile phase was buffered with 5 mM triethylammonium formate (pH 3.0) and the column temperature was maintained at 35°C. The eluted peaks were integrated and AFB<sub>1</sub> metabolites were quantitated with the standard curves for each metabolite or biomarker. Authentic AFB<sub>1</sub> metabolites were eluted at 15.5 min for AFB-NAC and 18.9 min for AFM<sub>1</sub>. The limit of detection for the method was 1.0 pg for AFM<sub>1</sub> and 5 pg for AFB-NAC. Urinary creatinine concentration was determined with the Diagnostic Creatinine Kit from Sigma-Aldrich Chemical Company according to the manufacturer's instruction. Recovery was 90% for spiked AFM<sub>1</sub> (0.25–5 ng), 83% for spiked AFB-NAC (0.5–10 ng) and 55–65% for spiked AFB<sub>2</sub> (0.5–5 ng) for this method.

#### Statistical analysis

All data generated were stored in an Excel database and analyzed with SAS software version 9.3 (SAS Institute, Cary, NC). Median, mean, standard deviations (SDs) and range were calculated for concentrations of AFB-AA, AFM<sub>1</sub> and AFB-NAC and the values were expressed as median and mean ± SD unless otherwise stated. To assess the efficacy of GTPs intervention, the statistical evaluation focused on the comparisons of different treatments and different time points. To evaluate the overall effects of dose, time and the dose × time interaction on AFB-AA, AFM<sub>1</sub>, AFB-NAC and AFB-NAC/AFM<sub>1</sub>, a non-parametric mixed-effects model was used (28). To facilitate interpretation of the mixed-effects model results, repeated measures analysis of variance were performed to compare time periods within a dose group. Cross-sectional analyses of variance were performed to compare groups within a time period. For parameters that were normally distributed, analysis of variance and Bonferroni corrected *t*-tests were used. For parameters that were not normally distributed, a Kruskal-Wallis test or Wilcoxon rank sum test was used. A *P* value of <0.05 (two tailed) was considered significant.

## Results

#### Sample collection over the study period

A total of 120 human subjects were recruited and 116 human subjects (96.7%) completed the 3 month intervention trial. Among the three time points of sample collection, 352 serum samples and 352 urine samples were collected from the participants.

#### Modulation of serum AFB-AA levels

All 352 serum samples collected over the 3 month study period were analyzed and all samples (100%) had detectable AFB-AA. Average levels (median and mean ± SD) and the range of serum AFB-AA in the three treatment groups at different time points are shown in Table I. There were no differences in AFB-AA level among the treatment groups at baseline (*P* = 0.506). The distributions of AFB-AA throughout the study duration are shown in Figure 1. No statistically significant differences were observed in AFB-AA levels in the placebo group over the 3 month period (*P* = 0.252). However,

**Table I.** Levels of AFB<sub>1</sub> biomarkers in GTPs intervention study<sup>a</sup>

| Time (month)                              | Placebo                                   | GTP 500 mg                                             | GTP 1000 mg                                            |
|-------------------------------------------|-------------------------------------------|--------------------------------------------------------|--------------------------------------------------------|
| <b>AFB-AA (pmol/mg albumin)</b>           |                                           |                                                        |                                                        |
| 0                                         | 0.92<br>0.91 ± 0.24<br>(0.48–1.41)        | 0.89<br>0.92 ± 0.28<br>(0.36–1.63)                     | 0.91<br>0.92 ± 0.24<br>(0.49–1.55)                     |
| 1                                         | 0.90<br>0.96 ± 0.32<br>(0.32–1.70)        | 0.94<br>0.96 ± 0.23<br>(0.65–1.54)                     | 0.77 <sup>b</sup><br>0.82 ± 0.27<br>(0.35–1.40)        |
| 3                                         | 0.85<br>0.85 ± 0.26<br>(0.16–1.40)        | 0.74 <sup>c</sup><br>0.79 ± 0.19<br>(0.26–1.19)        | 0.78<br>0.80 ± 0.34<br>(0.50–1.40)                     |
| <b>AFM<sub>1</sub> (pg/mg creatinine)</b> |                                           |                                                        |                                                        |
| 0                                         | 7.69<br>59.41 ± 141.99<br>(0.42–730.2)    | 6.02<br>60.85 ± 148.17<br>(0.59–746.10)                | 6.75<br>40.12 ± 77.42<br>(0.52–308.27)                 |
| 1                                         | 13.87<br>61.67 ± 145.74<br>(0.52–881.39)  | 8.29<br>15.03 ± 15.82<br>(0.38–64.27)                  | 14.27<br>20.06 ± 16.14<br>(0.77–51.50)                 |
| 3                                         | 11.24<br>78.66 ± 243.32<br>(0.24–1276.25) | 6.51<br>16.12 ± 45.07<br>(0.18–222.35)                 | 6.41<br>25.95 ± 73.03<br>(0.12–338.85)                 |
| <b>AFB-NAC (pg/mg creatinine)</b>         |                                           |                                                        |                                                        |
| 0                                         | 5.93<br>8.67 ± 9.83<br>(0.43–41.15)       | 6.34<br>10.31 ± 12.38<br>(0.38–50.77)                  | 6.54<br>9.32 ± 11.32<br>(0.60–67.71)                   |
| 1                                         | 5.50<br>9.95 ± 12.97<br>(0.09–57.92)      | 37.95 <sup>c</sup><br>79.53 ± 89.48<br>(1.57–362.47)   | 43.09 <sup>c</sup><br>79.48 ± 93.07<br>(0.30–465.62)   |
| 3                                         | 4.27<br>6.11 ± 8.72<br>(0.43–50.58)       | 72.29 <sup>c</sup><br>97.76 ± 100.03<br>(11.32–501.48) | 61.34 <sup>c</sup><br>96.60 ± 117.45<br>(18.20–560.30) |
| <b>AFB-NAC/AFM<sub>1</sub></b>            |                                           |                                                        |                                                        |
| 0                                         | 1.01<br>2.53 ± 3.93<br>(0.01–15.05)       | 1.35<br>3.13 ± 4.70<br>(0.01–17.96)                    | 1.05<br>2.54 ± 3.37<br>(0.02–13.40)                    |
| 1                                         | 0.43<br>2.19 ± 4.02<br>(0.01–15.36)       | 4.40 <sup>c</sup><br>22.05 ± 58.35<br>(0.08–333.80)    | 2.86 <sup>d</sup><br>8.21 ± 15.94<br>(0.40–89.29)      |
| 3                                         | 0.26<br>5.39 ± 6.88<br>(0.01–30.71)       | 6.72 <sup>c</sup><br>16.45 ± 22.94<br>(0.03–109.33)    | 6.92 <sup>c</sup><br>12.46 ± 17.17<br>(0.01–95.22)     |

<sup>a</sup>Data are presented in the form: median, mean ± SD and (range).

<sup>b</sup>*P* = 0.05 as compared with the baseline.

<sup>c</sup>*P* < 0.01 as compared with the baseline and the placebo.

<sup>d</sup>*P* < 0.05 as compared with the baseline.

statistically significant difference in AFB-AA levels was observed in the 500 mg GTPs group over the 3 month period (*P* = 0.002). A marginally significant difference in AFB-AA levels was also found in the 1000 mg GTPs group over the 3 month intervention (*P* = 0.051). As shown in Table I, compared with levels at baseline and the placebo, a significant decrease in AFB-AA level (*P* < 0.01) was found in the 500 mg GTPs group at the 3 months of intervention. As compared with levels at baseline, marginally significant decreases in the adduct levels were also found in the 1000 mg GTPs group at both 1 month (*P* = 0.050) and 3 months (*P* = 0.079) of intervention. The non-parametric mixed-effects model showed significant effects of time (*P* = 0.003) and dose-time interaction (*P* = 0.049) for reducing serum AFB-AA levels (Table II) and this reduction was attributed to GTP intervention. In addition, no significant gender difference was found (data not shown).

#### Modulation of urinary AFM<sub>1</sub> level

A total of 352 urine samples collected over the 3 months GTP intervention were analyzed for AFM<sub>1</sub>. About 95% (334/352) of the

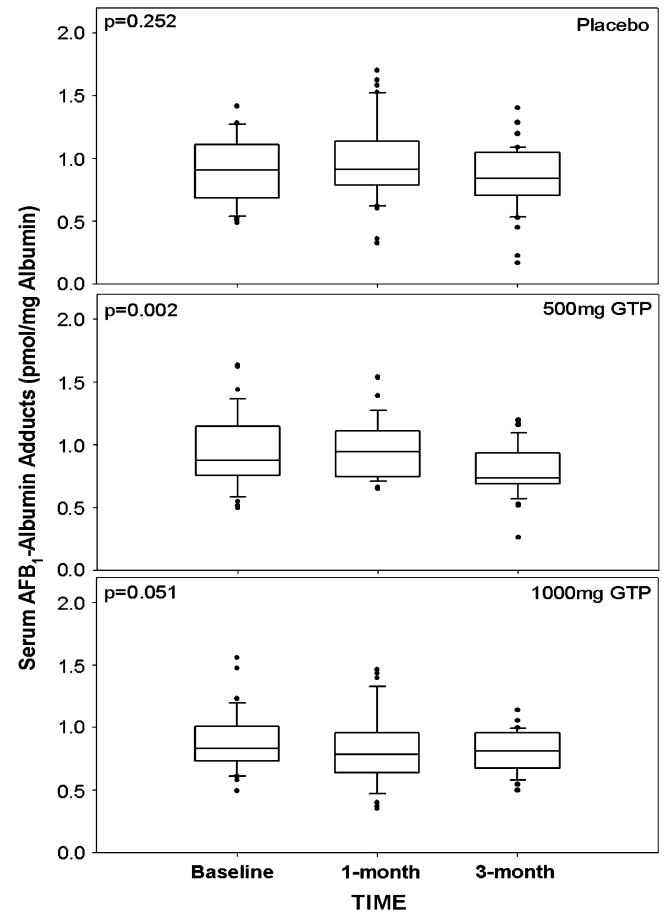

**Fig. 1.** Serum AFB-AA levels over 3 months GTP intervention. The box plots shows distribution of serum AFB-AA levels in each group at each time point. The box values ranged from 25 to 75 percentile of the total samples, the line within it indicating the median value. The bars on both sides of a box represent values ranging from 5 to 25 percentile and from 75 to 95 percentile, respectively.

samples had detectable AFM<sub>1</sub> and no significant differences in detection rate (frequency) among the three treatment groups were found. As shown in Table I, no statistically significant difference was found in average levels (median and mean ± SD) and the range of AFM<sub>1</sub> in the three study groups at the baseline, 1 and 3 months of the intervention. The distribution of urinary AFM<sub>1</sub> levels in these three groups is shown in Figure 2. Because the AFM<sub>1</sub> data are highly skewed, non-parametric analysis was applied for all statistical evaluations. There were no significant differences in median AFM<sub>1</sub> levels among the three study groups at the baseline (*P* = 0.832), 1 month (*P* = 0.188) or 3 months (*P* = 0.132). However, as compared with the placebo groups, 42 and 43% reductions in median AFM<sub>1</sub> levels were found in the 500 mg GTPs group (*P* = 0.096) and the 1000 mg GTPs group (*P* = 0.072) at 3 months of intervention, respectively. The non-parametric mixed-effects model showed a significant time effect on urinary AFM<sub>1</sub> levels (Table II), but no dose or dose-time interaction was found. In addition, no significant gender difference was found (data not shown).

#### Modulation of urinary AFB-NAC levels

A total of 352 urine samples collected over 3 months intervention study were simultaneously analyzed for AFB-NAC. Again, ~95% (336/352) of the samples had detectable AFB-NAC and no significant difference was found in the detection rate (frequency) among the three treatment groups. Average levels (median and mean ± SD) and the range of AFB-NAC in three study groups at baseline, 1 and 3 months are also presented in Table I. The distribution of urinary AFB-NAC levels in these three groups is shown in Figure 2. No statistically

**Table II.** Non-parametric mixed-effects model analysis

| Effect      | Serum AFB-AA                       | Urinary AFM <sub>1</sub> | Urinary AFB-NAC        | Urinary AFB-NAC/AFM <sub>1</sub> |
|-------------|------------------------------------|--------------------------|------------------------|----------------------------------|
| Dose        | 0.681 ( $P = 0.506$ ) <sup>a</sup> | 0.757 ( $P = 0.465$ )    | 74.993 ( $P < 0.001$ ) | 21.797 ( $P < 0.001$ )           |
| Time        | 6.371 ( $P = 0.003$ )              | 57.974 ( $P < 0.001$ )   | 72.164 ( $P < 0.001$ ) | 76.601 ( $P < 0.001$ )           |
| Dose × time | 2.550 ( $P = 0.049$ )              | 0.541 ( $P = 0.597$ )    | 25.382 ( $P < 0.001$ ) | 8.217 ( $P < 0.001$ )            |

<sup>a</sup>Statistic box-approximation value ( $P$  value).

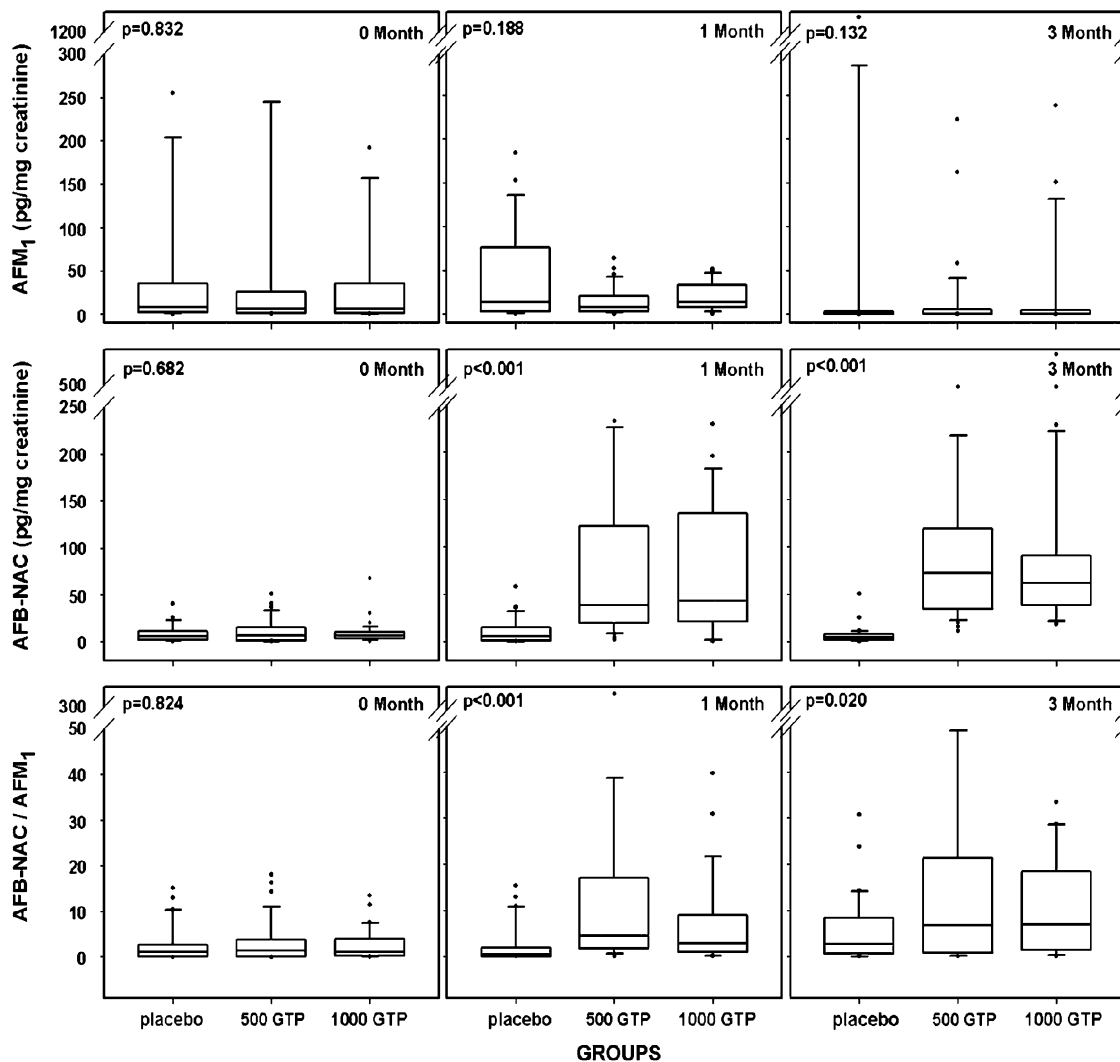

**Fig. 2.** Urinary AFM<sub>1</sub>, AFB-NAC and AFB-NAC/AFM<sub>1</sub> levels over 3 months GTP intervention. The box plots show distributions of urinary AFM<sub>1</sub>, AFB-NAC and AFB-NAC/AFM<sub>1</sub> levels in each group at each time points. The box values ranged from 25 to 75 percentile of the total samples, the line within it indicating the median value. The bars on both sides of a box represent values ranging from 5 to 25 percentile and from 75 to 95 percentile, respectively.

significant difference was found among the baseline ( $P = 0.682$ ) or the placebo group over 3 months period; however, there were statistically significant elevations in median AFB-NAC levels among the three study groups at 1 month ( $P < 0.001$ ) and 3 months ( $P < 0.001$ ) of GTP intervention (Figure 2). Median AFB-NAC levels increased ~7- and 17-fold in the 500 mg GTPs group at 1 and 3 months, respectively. Approximately 8- and 14-fold increases of median AFB-NAC levels were observed in the 1000 mg GTPs group at 1 and 3 months, respectively. The non-parametric mixed-effects model showed significant effects for dose, time and the dose-time interaction on urinary AFB-NAC levels (Table II). In addition, no significant gender difference was found (data not shown).

#### Modulation of AFB metabolic pattern

Because AFM<sub>1</sub> and AFB-NAC are major phase 1 and phase 2 metabolites of AFB<sub>1</sub>, the ratio of AFB-NAC:AFM<sub>1</sub> was postulated to better reflect the overall modulation of AFB<sub>1</sub> metabolism by incorporating both phase 2 and phase 1 metabolites. As shown in Table I, no statistically significant difference was found among the baseline ( $P = 0.824$ ) or the placebo group over 3 months period. However, there were statistically significant elevations in the median ratio of AFB-NAC:AFM<sub>1</sub> among the three study groups at 1 month ( $P < 0.001$ ) and 3 months ( $P = 0.020$ ) as demonstrated in Figure 2. Approximately 10- and 26-fold increases of the median ratio of AFB-NAC:AFM<sub>1</sub> were

observed in the 500 mg GTPs group at 1 and 3 months (Table I), respectively. Approximately 7- and 27-fold increases of the median ratio of AFB-NAC:AFM<sub>1</sub> were found in the 1000 mg GTPs group at 1 and 3 months, respectively. The non-parametric mixed-effects model also showed significant effects on dose, time and the dose-time interaction on the ratios (Table II). It is apparent that treatment with GTPs enhanced the AFB<sub>1</sub> phase 2 detoxification pathway. Representative chromatograms of HPLC-fluorescence detection for AFB-NAC and AFM<sub>1</sub> are shown in Figure 3.

## Discussion

It is well known that the toxic and carcinogenic effects of AFB<sub>1</sub> are manifested after phase 1 metabolism by endogenous cytochrome P450 enzymes, such as CYP 1A2, 2A6 and 3A4 (7). These enzymes catalyze the formation of various oxidative derivatives, including AFM<sub>1</sub> and an unstable and highly reactive ultimate carcinogen, AFB<sub>1</sub>-8,9-epoxide that can covalently bind to macromolecules and form adducts (7). Two major macromolecular adducts are the AFB<sub>1</sub>-N<sup>7</sup>-guanine adduct in DNA (29) and the lysine adduct in serum albumin (30). AFB<sub>1</sub>-8,9-epoxide is further metabolized by phase 2 enzymes, GSTs, to produce AFB-NAC, a detoxification metabolite excreted in urine (24,27). Application of well-defined AFB<sub>1</sub> metabolic pathways and specific AFB<sub>1</sub> biomarkers to evaluate efficacy of chemopreventive agents such as GTPs could provide mechanistic information for human intervention trials as described in previous studies with oltipraz (27,31,32), which was initially identified as candidate chemopreventive agent based on its phase 2 enzyme-inducing property.

AFB<sub>1</sub>-specific biomarkers currently used in human and animal studies include AFM<sub>1</sub>, AFB-NAC and AFB-N<sup>7</sup>-guanine in urine and AFB-AA in serum (31,33). The AFB-AA, compared with urinary

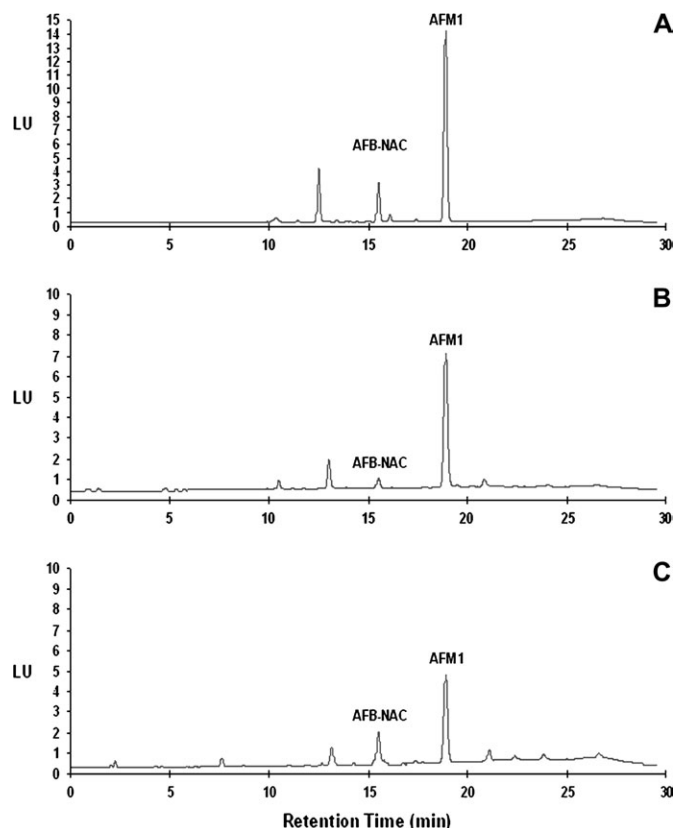

**Fig. 3.** Chromatograms of HPLC-fluorescence detection for urinary AFB-NAC and AFM<sub>1</sub>. (A) Authentic AFB-NAC and AFM<sub>1</sub> standards spiked to a non-detectable human urine sample. (B) A human urine sample collected at 0 month (baseline) and (C) a human urine sample collected at 3 months after GTP intervention.

AFB<sub>1</sub> metabolites, serves as a very important biomarker because its longer *in vivo* half-life may reflect integrated exposures over longer time periods (34). From a practical perspective relevant to epidemiological studies, the measurement of serum AFB-AA offers a rapid and facile approach that can be used to screen very large numbers of people, especially for population studies (35). The AFB-AA is also the most reliable molecular biomarker for studying human exposures to AFB<sub>1</sub>. Highly significant associations between AFB-AA levels and AFB<sub>1</sub> intake were found in human populations from several regions of the world (36–38). Using various analytical techniques, AFB-AA was detectable in almost 100% of sera from adults and in 12–100% of sera from children in China and various African countries (36–38). In addition to studying AFB<sub>1</sub> exposure, AFB-AA has been used as a biological response indicator of acute and chronic aflatoxicosis in Africa (38), risk of HCC in Taiwan (39), China (5,11,12) and Africa (38) and infectious disease-linked immune suppression (40,41). Moreover, AFB-AA has been regularly used as the surrogate efficacy biomarker of AFB<sub>1</sub> exposure for assessment of different therapeutic/intervention agents and techniques in human intervention trials (17,42).

In this study, high levels of serum AFB-AA were observed in the participants at baseline before GTPs intervention. These levels were comparable with levels found in populations at high risk for liver cancer in China (25,34,36) and confirmed high dietary exposure to AF in the study population. Daily GTPs administration significantly reduced levels of serum AFB-AA (Table I). A significant reduction (>15%) was observed in the 500 mg GTPs group at 3 months compared with levels of the placebo and the baseline (Table I and Figure 1). Decreases in this biomarker level were also observed in the 1000 mg GTP groups at 1 and 3 months after the intervention.

There are four methods currently available for measurement of serum AFB-AA: RIA using monoclonal antibodies 2B11 or 2A4B3 (17,25,34); enzyme-linked immunosorbent assay (ELISA) using polyclonal or monoclonal antibodies (35,38,39); IAC-HPLC-fluorescence method (25,37,38) and the recently developed liquid chromatography/mass spectrometry/mass spectrometry method with or without IAC purification (43,44). Among these four methods, RIA method has been widely validated in animal studies (45,46), human cross-sectional studies (34,37,41), human longitudinal studies (25), HCC case-control studies (47,48) and human chemoprevention studies with oltipraz (17). Correlations between ELISA and HPLC-fluorescence (38), between ELISA and liquid chromatography/mass spectrometry/mass spectrometry (49), between RIA and HPLC-fluorescence (25) and between RIA and ELISA (50) have been evaluated. Overall, data generated by these methods were highly correlated, e.g. RIA versus ELISA ( $r = 0.75$ ,  $P < 0.01$ ), RIA versus HPLC ( $r = 0.87$ ,  $P < 0.01$ ) and 2B11 RIA versus 2A4B3 RIA ( $r = 0.86$ ,  $P < 0.01$ ) (50).

AFM<sub>1</sub> is a metabolite of AFB<sub>1</sub> that is prevalent in urine and milk and its formation from parent AFB<sub>1</sub> is catalyzed mainly by hepatic CYP 1A2 in humans (27). The excretion of AFM<sub>1</sub> in urine represents recent AFB<sub>1</sub> exposure (i.e. within 24–48 h). Thus, AFM<sub>1</sub> levels in urine are used as a short-term biomarker of AFB<sub>1</sub> exposure (37). Both serum AFB-AA and urinary AFM<sub>1</sub> have been extensively characterized and validated as biomarkers for AFB<sub>1</sub> exposure in many human populations, which correlated well with dietary intake of AFB<sub>1</sub> (33,37) and the risk of human HCC (33). Concurrent with reductions in serum AFB-AA levels after GTP intervention, urinary AFM<sub>1</sub> levels were reduced (up to 43% in median level) at 3 months of intervention, which is comparable with the reduction rate of 55% in the median level of AFB<sub>1</sub>-N<sup>7</sup>-guanine, another short-term biomarker of AFB<sub>1</sub> exposure, after 3 months intervention with 100 mg chlorophyllin (16).

As demonstrated by many previous studies, the chemopreventive action of a variety of natural products or drugs is associated with the induction of carcinogen detoxification enzymes (51). Induction of phase 2 enzymes plays a crucial role in providing a barrier against exogenous chemical carcinogenic effects (52). AFB-NAC is the major detoxifying metabolic product of AFB<sub>1</sub>-8,9-epoxide (24,27). GTPs intervention significantly elevated levels of AFB-NAC in urine excretion in both the 500 and 1000 mg groups, which suggests that activity of GSTs was greatly induced. The increase in the

AFB<sub>1</sub>-NAC:AFM<sub>1</sub> ratio in GTPs-treated groups further demonstrated effective modulation of GTPs on induction of the phase 2 detoxifying pathway in AFB<sub>1</sub> metabolism. This finding is consistent with a recent finding that GTPs increased the activity of GSTs in 42 human subjects who underwent 4 weeks of intervention with polyphenon E (53).

Results of this study clearly show that GTP intervention effectively modulated AFB<sub>1</sub> metabolism as well as metabolic activation, as demonstrated by the decreased serum levels of AFB-AA and urinary levels of AFM<sub>1</sub>. This suggests that GTPs may inhibit phase 1 metabolic enzymes, such as CYP 1A2, 2A6 and 3A4. Based on the moderate effect in reducing levels of AFM<sub>1</sub>, a major CYP 1A2 metabolite, in urine, GTPs seems to be a moderate or reversible inhibitor of 1A2 enzyme. This is different from the modulation effect of oltipraz, which is a potent and perhaps irreversible inhibitor of 1A2 (27).

While data from this study clearly demonstrated that GTPs modulate AFB<sub>1</sub> metabolism and metabolic activation, large variations in levels of individual AFB<sub>1</sub> biomarkers were found, especially for urinary AFM<sub>1</sub> and AFB-NAC levels. The variability of these biomarkers in study participants may be attributed to seasonal changes in food contamination in the region, as well as to genotypic or phenotypic variations on specific metabolic enzymes and individual susceptibility. Another issue that has been raised is the analytical limitation of the current study, due to the use of antibody-based RIA and IAC-HPLC techniques, which compared with recently developed liquid chromatography/mass spectrometry/mass spectrometry method, the specificity and sensitivity may be lower. Levels of AF biomarkers measured by antibody-based methods are usually higher than those measured through the LC/MS method in which isotope internal standard was coupled. It would be potentially important in ultimate risk assessment for AF exposure if a global collaborative study is set up for addressing the issue on various results generated by different analytical methods, using LC/MS method as the standard. In any sense, LC/MS method should be incorporated into all future AF exposure and intervention studies, at least used as a confirmatory step.

Safety and efficacy are the two most important criteria for assessing potentially chemopreventive agents. The safety of GTPs has been well documented in animal and human studies (19,20), including this 3 months trial (15). Results from this study show the efficacy of GTPs through modulation of AFB<sub>1</sub> metabolism, metabolic activation and detoxification. As summarized in Figure 4, there are two major metabolic pathways for AFB<sub>1</sub>: phase 1 metabolism and metabolic activation and phase 2 detoxification (27,33). AFM<sub>1</sub> and AFB<sub>1</sub>-8,9-epoxide are the major phase 1 metabolic products and AFB<sub>1</sub>-N<sup>7</sup>-guanine in tissues and urine and AFB-AA in serum are specific biomarkers for AFB<sub>1</sub> metabolic activation. AFB-NAC is the major phase 2 detoxification product of AFB<sub>1</sub>-8,9-epoxide. GTP intervention significantly blocked phase 1 metabolism and metabolic activation of AFB<sub>1</sub> and greatly induced phase 2 detoxifying enzymes, which

led to increased formation of AFB-NAC excreted in urine. Results from this study as well as previous studies (23,53) will help to define mechanistic roles of GTPs in cancer chemoprevention.

## Funding

National Institute of Environmental Health Sciences (ES11442); National Cancer Institute (CA90997).

## Acknowledgements

We thank the investigation team members from Fusui Liver Cancer Institute for sample collection and township and village doctors for distribution of GTPs. We appreciate the cooperation of all study subjects who generously volunteered.

Conflict of Interest Statement: None declared

## References

- Parkin,D.M. et al. (1993) Estimates of the worldwide incidence of eighteen major cancers in 1985. *Int. J. Cancer*, **54**, 594–606.
- American Cancer Society. (2007) *Cancer Facts & Figures—2007*. American Cancer Society, Atlanta, GA.
- Li,N.-D. et al. (1997) Trends and prediction in malignant tumors mortality in past 20 years in China. *Chin. J. Oncol.*, **19**, 3–9.
- Huang,T. et al. (2006) An analysis on morbidity of liver cancer in the period of 1997~2003 in Fusui, Guangxi. *Guangxi Med.*, **28**, 1336–1339.
- Yeh,F.S. et al. (1989) Hepatitis B virus, aflatoxins, and hepatocellular carcinoma in southern Guangxi, China. *Cancer Res.*, **49**, 2506–2509.
- Busby,W.F.Jr et al. (1984) Aflatoxins. In Seal,C.D. (ed.) *Chemical Carcinogens*. American Chemical Society, Washington, DC, pp. 945–1136.
- Wang,J.-S. et al. (1999) DNA damage by mycotoxins. *Mutat. Res.*, **424**, 167–181.
- IARC. (1993) Some naturally occurring substances: food items and constituents, heterocyclic aromatic amines and mycotoxins. In: *IARC Monographs on the Evaluation of Carcinogenic Risks to Humans*. IARC Press, Lyon, France Vol. 56, pp. 207–271.
- IARC. (2002) Some traditional herbal medicines, some mycotoxins, naphthalene and styrene. In: *IARC Monographs on the Evaluation of Carcinogenic Risks to Humans*. IARC Press, Lyon, France Vol. 82 pp. 171–274.
- Wogan,G.N. (1992) Aflatoxins as risk factors for hepatocellular carcinoma in humans. *Cancer Res.*, **52**, 2114s–2118s.
- Ross,R.K. et al. (1992) Urinary aflatoxin biomarkers and risk of hepatocellular carcinoma. *Lancet*, **339**, 943–946.
- Qian,G.S. et al. (1994) A follow-up study of urinary markers of aflatoxin exposure and liver cancer risk in Shanghai, People's Republic of China. *Cancer Epidemiol. Biomarkers Prev.*, **3**, 3–10.
- Kensler,T.W. et al. (2004) Chemoprevention of hepatocellular carcinoma in aflatoxin endemic areas. *Gastroenterology*, **127**, S310–S318.
- Kensler,T.W. et al. (2002) Strategies for chemoprevention of liver cancer. *Eur. J. Cancer Prev.*, **11** (suppl. 2), S58–S64.
- Huang,T. et al. (2004) Phase IIa chemoprevention trial of green tea polyphenols in high-risk individuals of liver cancer: I. design, clinical outcomes, and baseline biomarker data. *Int. J. Cancer Prev.*, **1**, 269–280.
- Egner,P.A. et al. (2001) Chlorophyllin intervention reduces aflatoxin-DNA adducts in individuals at high risk for liver cancer. *Proc. Natl Acad. Sci. USA*, **98**, 14601–14606.
- Kensler,T.W. et al. (1998) Oltipraz chemoprevention trial in Qidong, People's Republic of China: modulation of serum aflatoxin albumin adduct biomarkers. *Cancer Epidemiol. Biomarkers Prev.*, **7**, 127–134.
- Qin,G. et al. (1997) Inhibition of aflatoxin B1-induced initiation of hepatocarcinogenesis in the rat by green tea. *Cancer Lett.*, **112**, 149–154.
- Yang,C.S. et al. (2002) Inhibition of carcinogenesis by tea. *Annu. Rev. Pharmacol. Toxicol.*, **42**, 25–54.
- Yang,C.S. et al. (2006) Possible mechanisms of the cancer-preventive activities of green tea. *Mol. Nutr. Food Res.*, **50**, 170–175.
- Ito,Y. et al. (1989) Chromosome aberrations induced by aflatoxin B1 in rat bone marrow cells *in vivo* and their suppression by green tea. *Mutat. Res.*, **222**, 253–261.
- Yang,C.S. et al. (2006) Molecular targets for the cancer preventive activity of tea polyphenols. *Mol. Carcinog.*, **45**, 431–435.
- Luo,H. et al. (2006) Phase IIa chemoprevention trial of green tea polyphenols in high-risk individuals of liver cancer: modulation of urinary

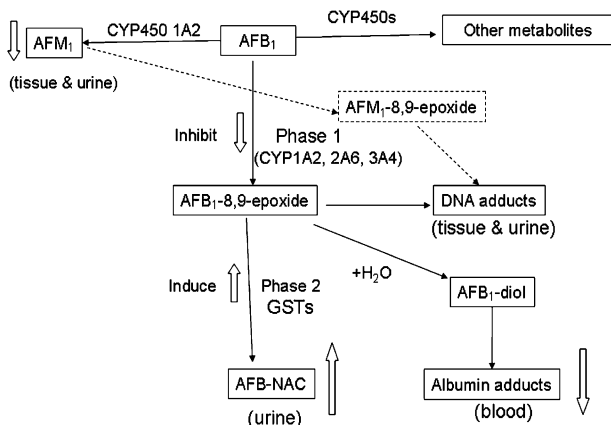

Fig. 4. AFB<sub>1</sub> metabolism, metabolic activation, detoxification, biomarkers and possible mechanisms of GTP modulation.

- excretion of green tea polyphenols and 8-hydroxydeoxyguanosine. *Carcinogenesis*, **27**, 262–268.
24. Scholl, P.F. *et al.* (1997) Synthesis and characterization of aflatoxin B1 mercapturic acids and their identification in rat urine. *Chem. Res. Toxicol.*, **10**, 1144–1151.
  25. Wang, J.S. *et al.* (1996) Temporal patterns of aflatoxin-albumin adducts in hepatitis B surface antigen-positive and antigen-negative residents of Daxin, Qidong County, People's Republic of China. *Cancer Epidemiol. Biomarkers Prev.*, **5**, 253–261.
  26. Gange, S.J. *et al.* (1996) Variability of molecular biomarker measurements from nonlinear calibration curves. *Cancer Epidemiol. Biomarkers Prev.*, **5**, 57–61.
  27. Wang, J.S. *et al.* (1999) Protective alterations in phase 1 and 2 metabolism of aflatoxin B1 by oltipraz in residents of Qidong, People's Republic of China. *J. Natl Cancer Inst.*, **91**, 347–354.
  28. Brunner, E. *et al.* (2002) Nonparametric Analysis of Longitudinal Data in Factorial Experiments. John Wiley, New York, NY.
  29. Essigmann, J.M. *et al.* (1977) Structural identification of the major DNA adduct formed by aflatoxin B1 *in vitro*. *Proc. Natl Acad. Sci. USA*, **74**, 1870–1874.
  30. Sabbioni, G. *et al.* (1987) Isolation and characterization of the major serum albumin adduct formed by aflatoxin B1 *in vivo* in rats. *Carcinogenesis*, **8**, 819–824.
  31. Groopman, J.D. *et al.* (1992) Molecular dosimetry of urinary aflatoxin-N7-guanine and serum aflatoxin-albumin adducts predicts chemoprotection by 1,2-dithiole-3-thione in rats. *Carcinogenesis*, **13**, 101–106.
  32. Kensler, T.W. *et al.* (1992) Mechanisms of chemoprotection by oltipraz. *J. Cell. Biochem. Suppl.*, **161**, 167–172.
  33. Groopman, J.D. *et al.* (1999) The light at the end of the tunnel for chemical-specific biomarkers: daylight or headlight? *Carcinogenesis*, **20**, 1–11.
  34. Wang, J.S. *et al.* (2001) Development of aflatoxin B(1)-lysine adduct monoclonal antibody for human exposure studies. *Appl. Environ. Microbiol.*, **67**, 2712–2717.
  35. Wild, C.P. *et al.* (1996) Aflatoxin-albumin adducts: a basis for comparative carcinogenesis between animals and humans. *Cancer Epidemiol. Biomarkers Prev.*, **5**, 179–189.
  36. Wang, J.S. *et al.* (2001) Hepatocellular carcinoma and aflatoxin exposure in Zhuqing Village, Fusui County, People's Republic of China. *Cancer Epidemiol. Biomarkers Prev.*, **10**, 143–146.
  37. Gan, L.S. *et al.* (1988) Serum albumin adducts in the molecular epidemiology of aflatoxin carcinogenesis: correlation with aflatoxin B1 intake and urinary excretion of aflatoxin M1. *Carcinogenesis*, **9**, 1323–1325.
  38. Wild, C.P. *et al.* (1990) Aflatoxin-albumin adducts in human sera from different regions of the world. *Carcinogenesis*, **11**, 2271–2274.
  39. Lunn, R.M. *et al.* (1997) p53 mutations, chronic hepatitis B virus infection, and aflatoxin exposure in hepatocellular carcinoma in Taiwan. *Cancer Res.*, **57**, 3471–3477.
  40. Turner, P.C. *et al.* (2003) Modification of immune function through exposure to dietary aflatoxin in Gambian children. *Environ. Health Perspect.*, **111**, 217–220.
  41. Jiang, Y. *et al.* (2005) Aflatoxin B1 albumin adduct levels and cellular immune status in Ghanaians. *Int. Immunol.*, **17**, 807–814.
  42. Kensler, T.W. *et al.* (1998) Use of aflatoxin adducts as intermediate endpoints to assess the efficacy of chemopreventive interventions in animals and man. *Mutat. Res.*, **402**, 165–172.
  43. McCoy, L.F. *et al.* (2005) Analysis of aflatoxin B1-lysine adduct in serum using isotope-dilution liquid chromatography/tandem mass spectrometry. *Rapid Commun. Mass Spectrom.*, **19**, 2203–2210.
  44. Scholl, P.F. *et al.* (2006) Quantitative analysis and chronic dosimetry of the aflatoxin B1 plasma albumin adduct lys-AFB1 in rats by isotope dilution mass spectrometry. *Chem. Res. Toxicol.*, **19**, 44–49.
  45. Egner, P.A. *et al.* (1995) Levels of aflatoxin-albumin biomarkers in rat plasma are modulated by both long-term and transient intervention with oltipraz. *Carcinogenesis*, **16**, 1769–1773.
  46. Tang, L. *et al.* (2007) Modulation of aflatoxin toxicity and biomarkers by lycopene in F344 rats. *Toxicol. Appl. Toxicol.*, **219**, 10–17.
  47. Soini, Y. *et al.* (1996) An aflatoxin-associated, mutational hotspot in the p53 tumor suppressor gene occurs in hepatocellular carcinoma from Mexico. *Carcinogenesis*, **17**, 1007–1012.
  48. Kuang, S.Y. *et al.* (1996) Aflatoxin-albumin adducts and risk for hepatocellular carcinoma in residents of Qidong, People's Republic of China. *Proc. Am. Assoc. Cancer Res.*, **37**, 1714.
  49. Scholl, P.F. *et al.* (2006) Quantitative comparison of aflatoxin B1 serum albumin adducts in humans by isotope dilution mass spectrometry and ELISA. *Cancer Epidemiol. Biomarkers Prev.*, **15**, 823–826.
  50. Wang, J.S. *et al.* (1996) Validation of methods and long-term stability of aflatoxin-albumin adducts in samples from high risk populations for liver cancer. *Proc. Am. Assoc. Cancer Res.*, **37**, 711.
  51. Kensler, T.W. *et al.* (1999) Development of cancer chemopreventive agents: oltipraz as a paradigm. *Chem. Res. Toxicol.*, **12**, 113–126.
  52. Kwak, M.K. *et al.* (2001) Role of phase 2 enzyme induction in chemoprotection by dithiolethiones. *Mutat. Res.*, **480–481**, 305–315.
  53. Chow, H.H. *et al.* (2007) Modulation of human glutathione s-transferases by polyphenon E intervention. *Cancer Epidemiol. Biomarkers Prev.*, **16**, 1662–1666.

Received August 28, 2007; revised December 28, 2007; accepted January 2, 2008
